# Supplementary material for: Vitamin C transporter Slc23a1 links renal reabsorption, vitamin C tissue accumulation, and perinatal survival in mice
Source: JCI journal article supplement (doi:10.1172/jci39191), 2010-03-08

## Supplemental Figure Legends

### **Figure 1**

Deletion of *slc23a1* in embryonic stem cells: knockout construct design.

### **Figure 2**

**Southern blot analyses of ES cell genomic DNA lysates.** ES Lysates (1-4) obtained from electroporated ES cells were digested with BclI. A 14kb band indicated the presence of the correctly targeted mutant allele, and a 10kb band indicated the presence of the wild type allele.

Supplemental Fig 1

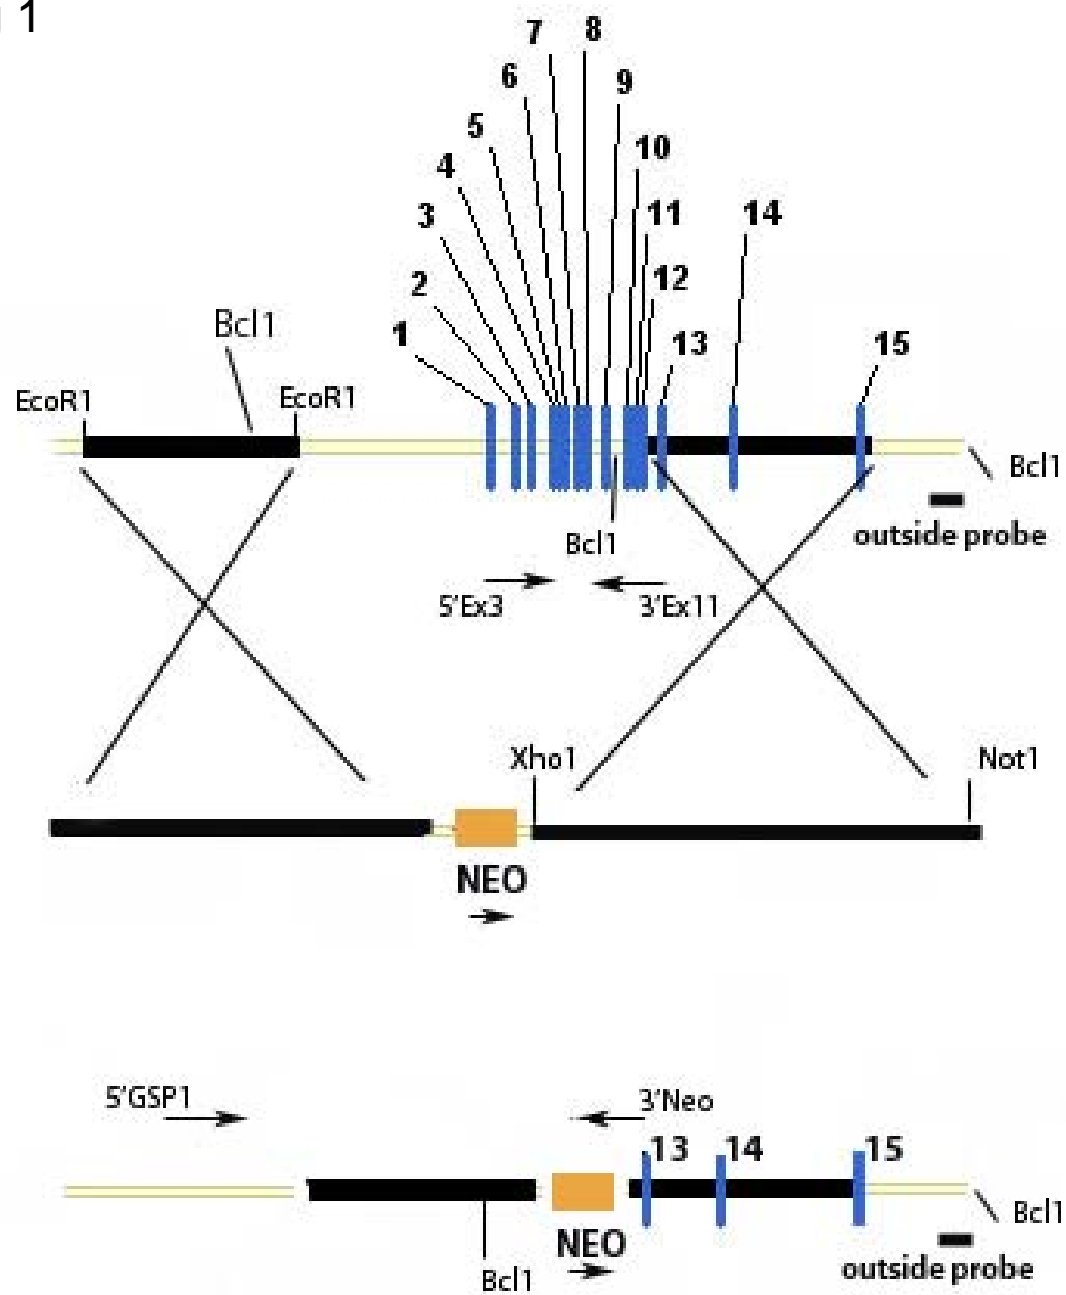

Supplemental Fig 2

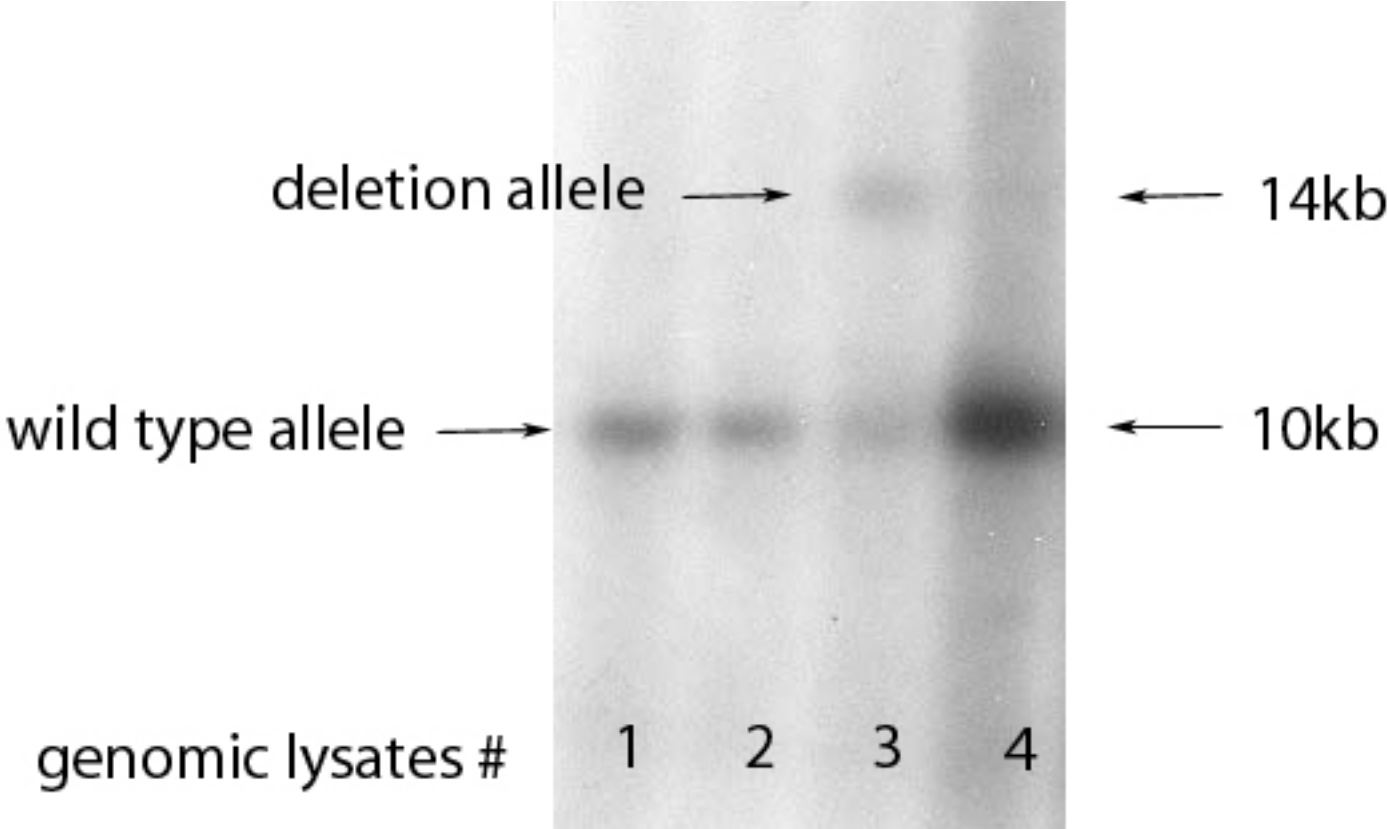

Supplement: sd1 [file 1]
